# Supplementary material for: Chemical Conversion of Hardly Ionizable Rhenium Aryl Chlorocomplexes with p-Substituted Anilines
Source: MDPI journal article supplement (doi:10.3390/molecules26113427), 2021-06-05
Supplement: s1 [file s1]

## Supplementary Materials

# Chemical Conversion of Hardly Ionizable Rhenium Aryl Chlorocomplexes with *p*-Substituted Anilines

Martin Štícha,<sup>1\*</sup> Ivan Jelínek,<sup>2</sup> Mikuláš Vlk<sup>2</sup>

<sup>1</sup> *Department of Chemistry, Faculty of Science, Charles University, Prague 2, Czech Republic*

<sup>2</sup> *Department of Analytical Chemistry, Faculty of Science, Charles University, Prague 2, Czech Republic*

\* [sticha@natur.cuni.cz](mailto:sticha@natur.cuni.cz)

### Table of contents

**Figure S1.** HR ESI– MS/MS spektra of complex 1 ; collision energy, CE, was 40 eV.

**Figure S2.** HR ESI– MS/MS spektra of complex 2 ; collision energy, CE, was 40 eV.

**Figure S3.** HR ESI– MS/MS spektra of complex 3 ; collision energy, CE, was 40 eV.

**Figure S4.** HR ESI– MS/MS spektra of complex 4 ; collision energy, CE, was 40 eV.

**Figure S5.** HR ESI– MS/MS spektra of complex 5 ; collision energy, CE, was 40 eV.

**Figure S6.** Proposed fragmentation scheme of complex 1.

**Figure S7.** Proposed fragmentation scheme of complex 3.

**Figure S8.** Proposed fragmentation scheme of complex 4.

**Figure S9.** Proposed fragmentation scheme of complex 5.

**Figure S10.** CID diagram of complex 1.

**Figure S11.** CID diagram of complex 3.

**Figure S12.** CID diagram of complex 4.

**Figure S13.** Graph of calculated bond elongation of prepared complexes.

**Table S1.** Cartesian coordinates calculated for the optimized neutral structure of complex 1.

**Table S2.** Cartesian coordinates calculated for the optimized neutral structure of complex 2.

**Table S3.** Cartesian coordinates calculated for the optimized neutral structure of complex 3.

**Table S4.** Cartesian coordinates calculated for the optimized neutral structure of complex 4.

**Table S5.** Cartesian coordinates calculated for the optimized neutral structure of complex 5.

**Table S6.** Chemical names, labels, and formulas of prepared rhenium complexes.

**Table S7.** Calculated bond elongation of prepared complexes.

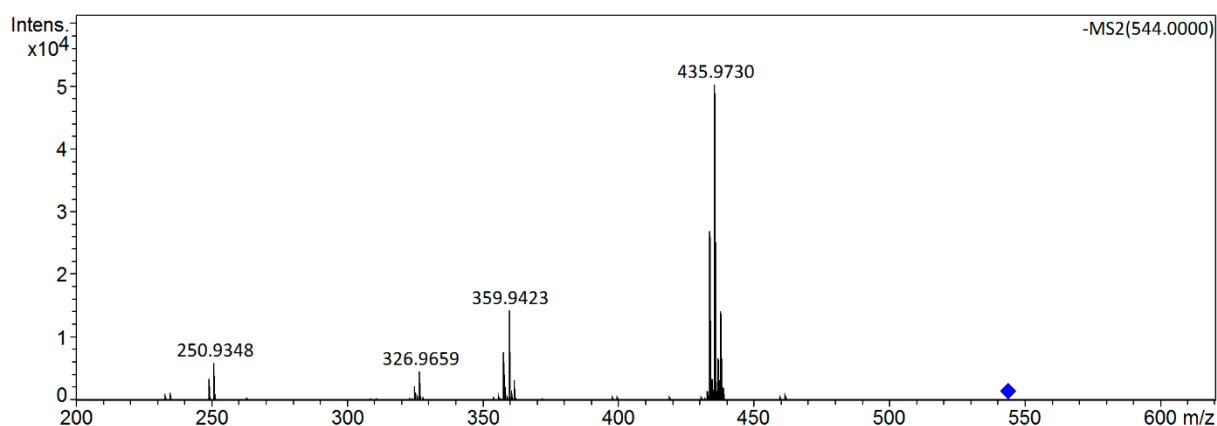

Figure S1. HR ESI– MS/MS spektra of complex 1; collision energy, CE, was 40 eV.

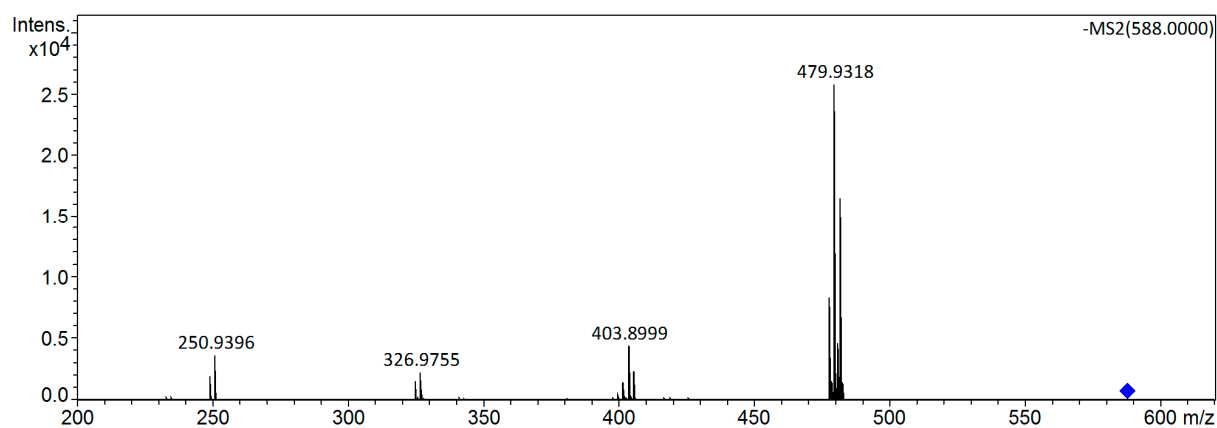

Figure S2. HR ESI– MS/MS spektra of complex 2; collision energy, CE, was 40 eV.

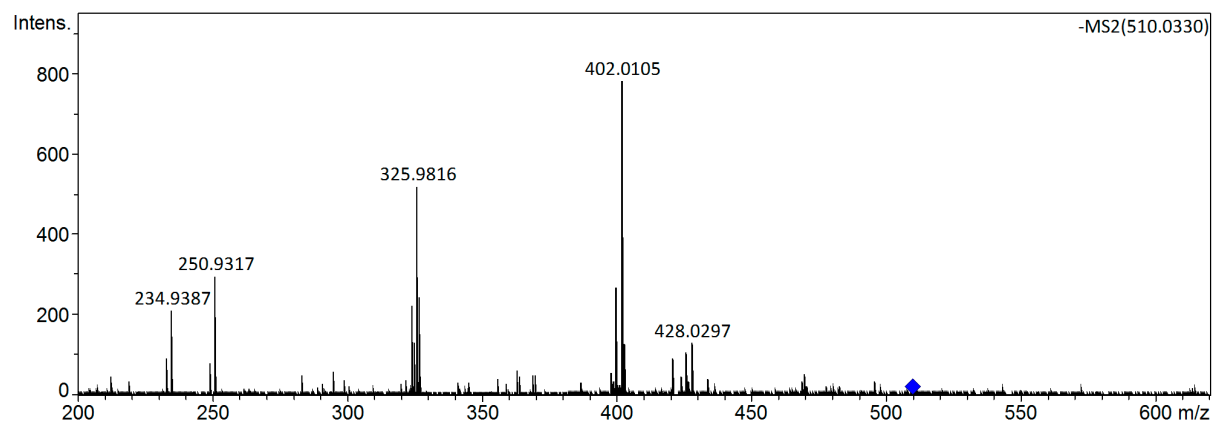

Figure S3. HR ESI– MS/MS spektra of complex 3; collision energy, CE, was 40 eV.

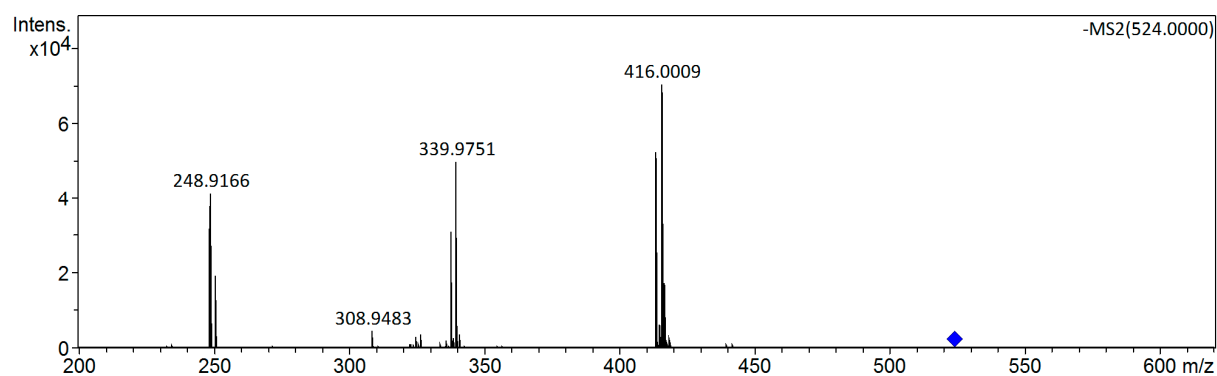

Figure S4. HR ESI- MS/MS spektra of complex 4; collision energy, CE, was 40 eV.

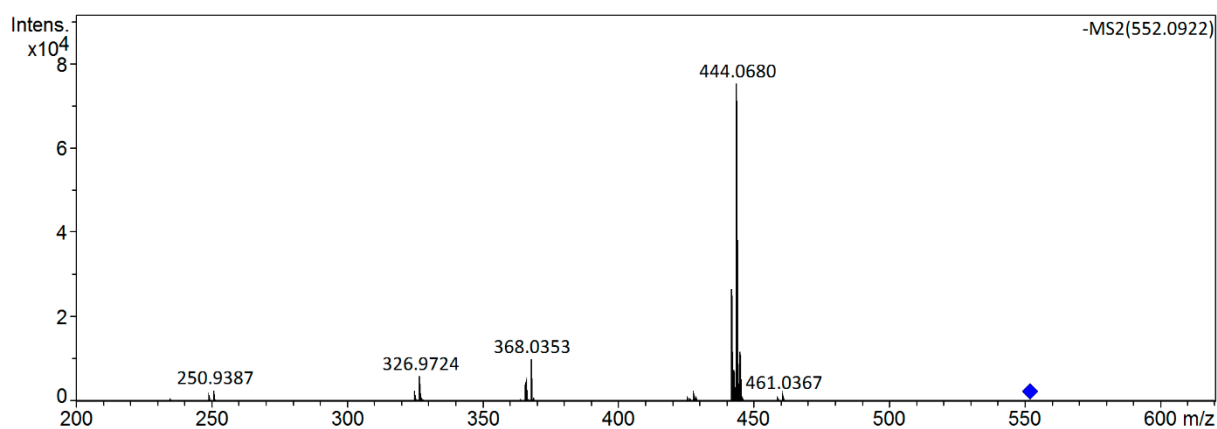

Figure S5. HR ESI- MS/MS spektra of complex 5; collision energy, CE, was 40 eV.

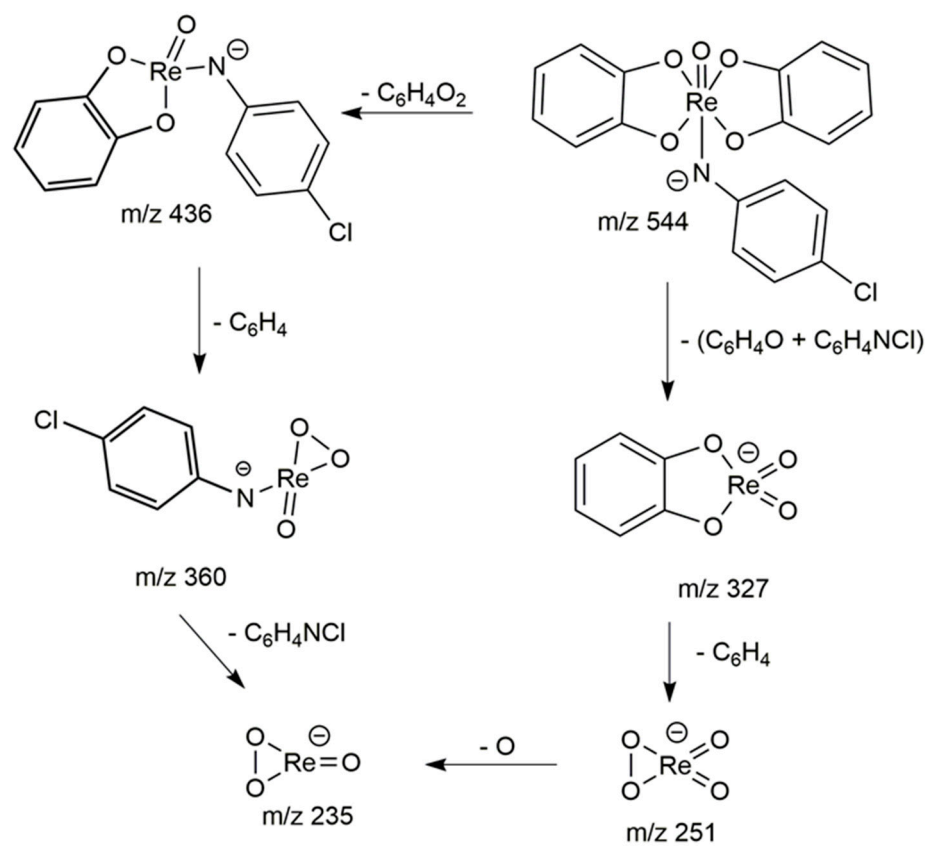

Figure S6. Proposed fragmentation scheme of complex 1.

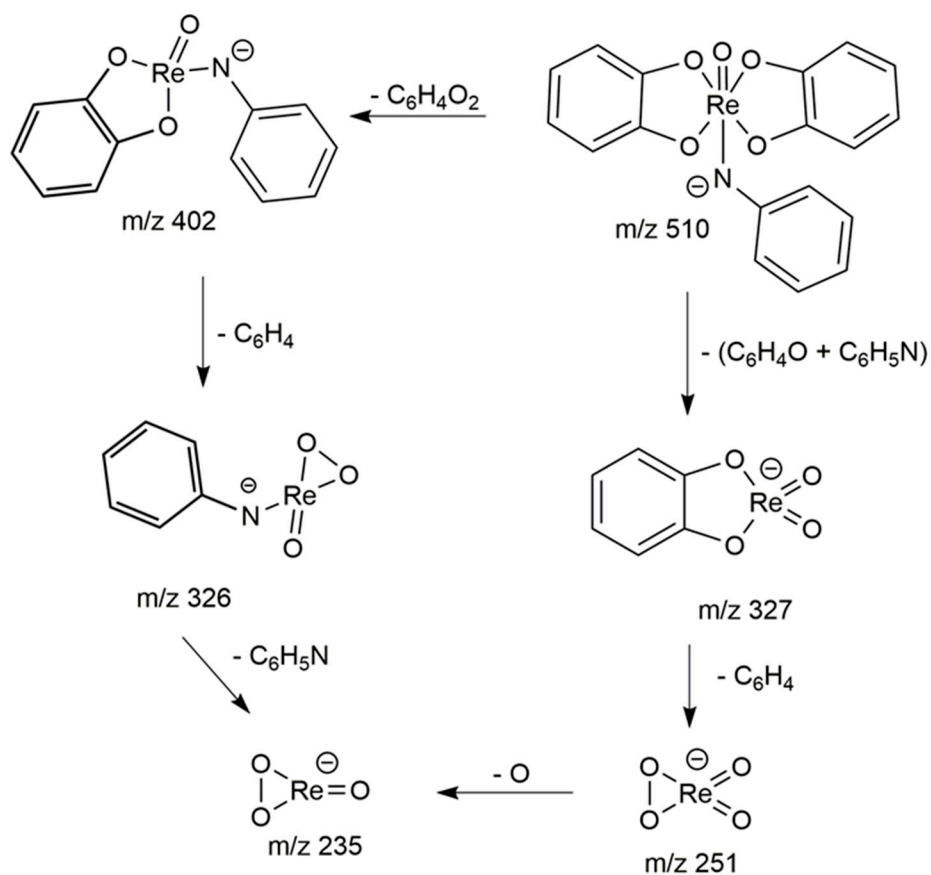

Figure S7. Proposed fragmentation scheme of complex 3

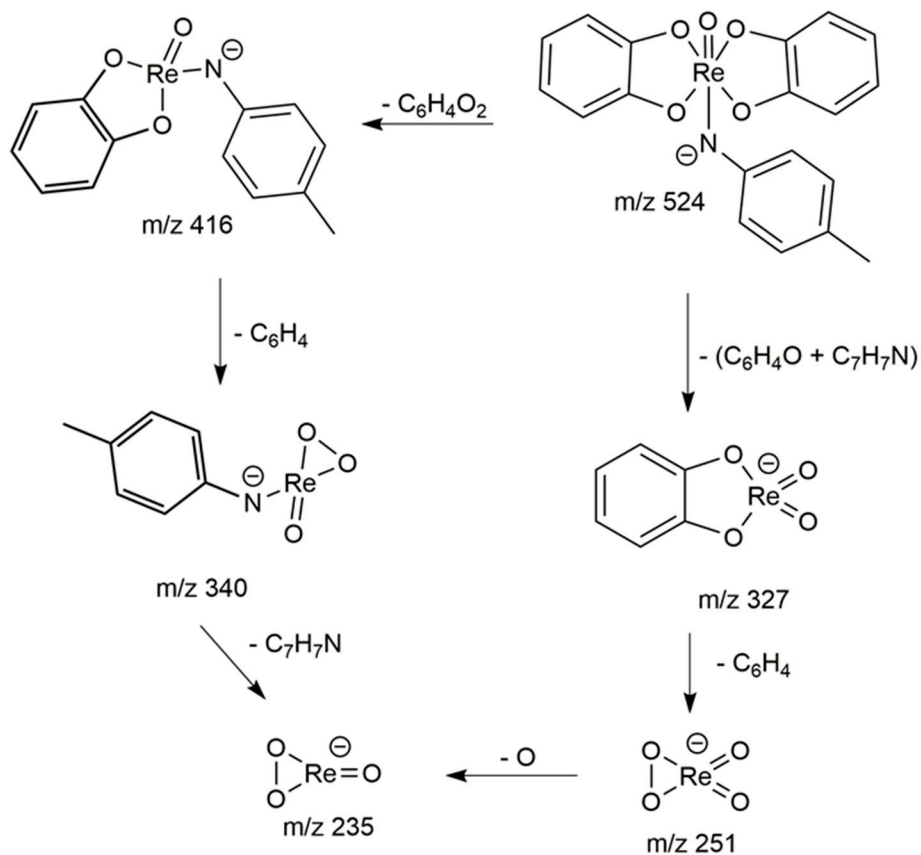

Figure S8. Proposed fragmentation scheme of complex 4

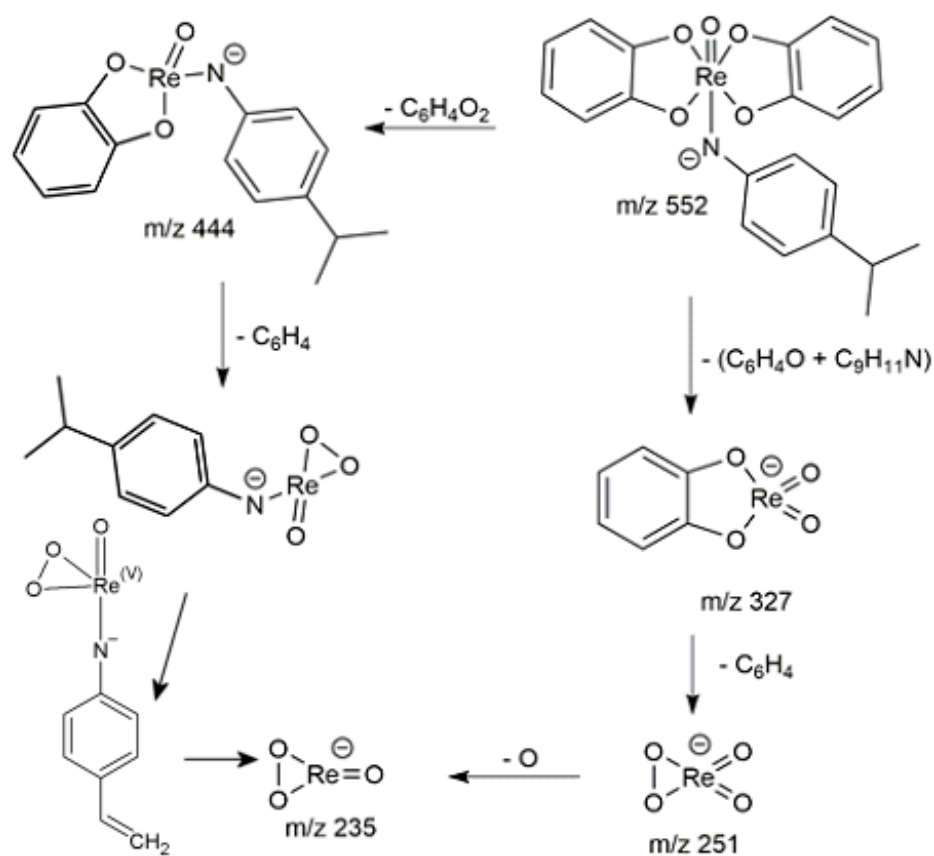

Figure S9. Proposed fragmentation scheme of complex 5

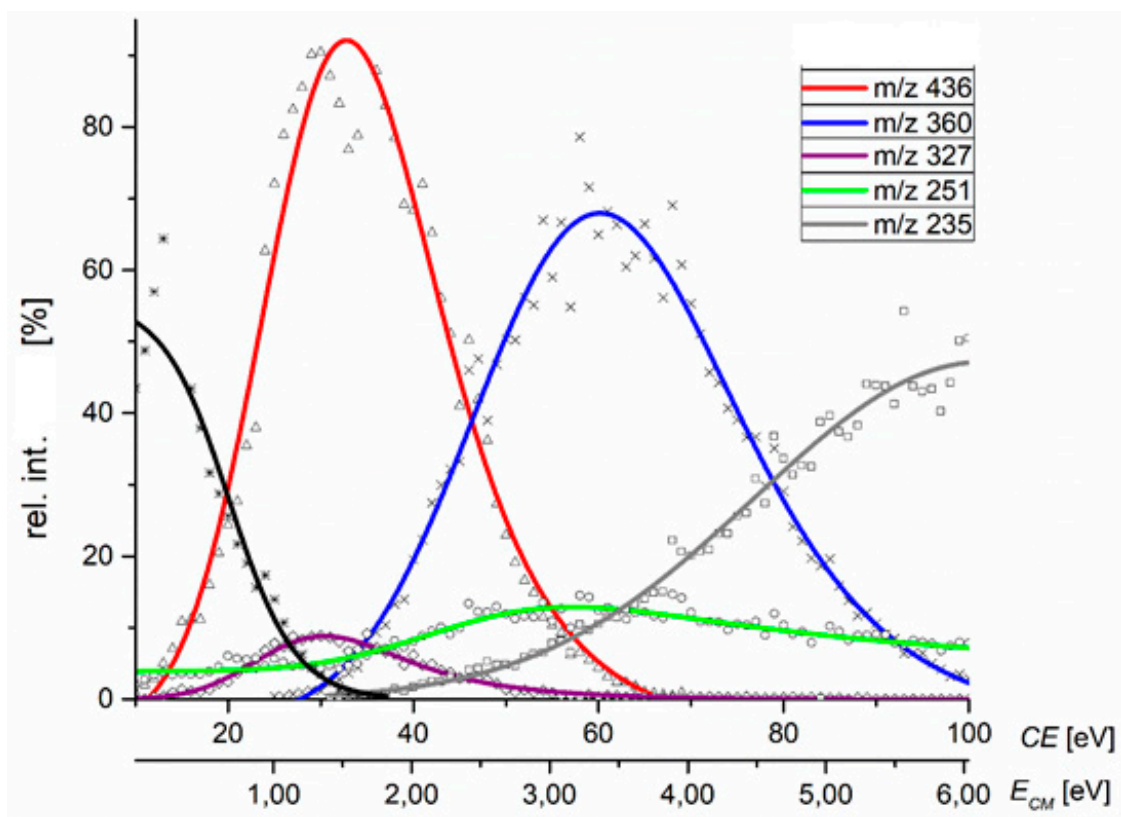

Figure S10. CID diagram of complex 1

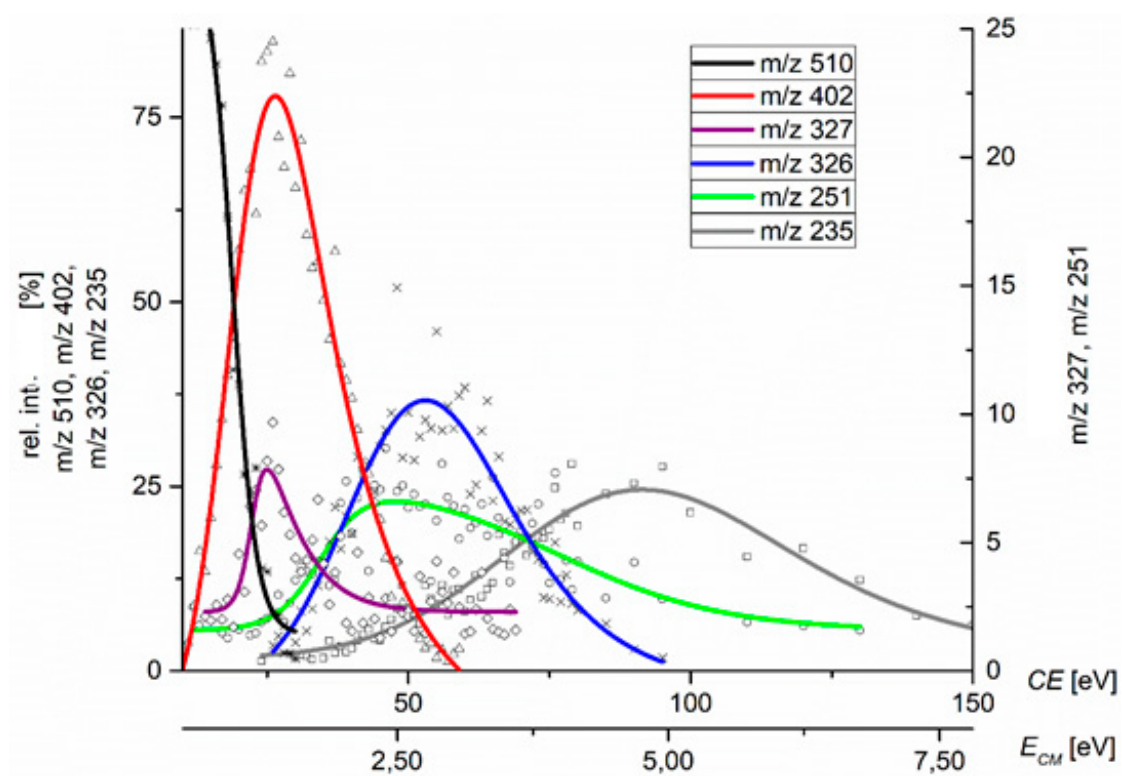

Figure S11. CID diagram of complex 3

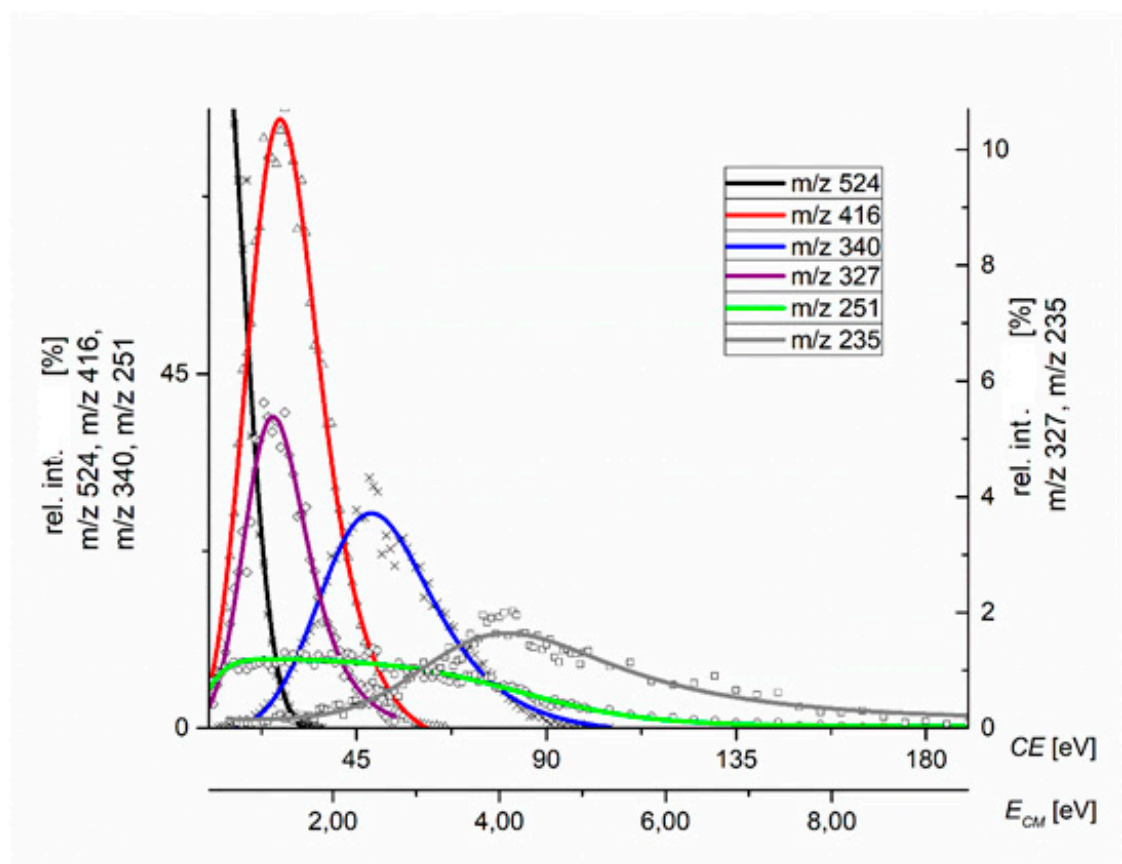

Figure S12. CID diagram of complex 4

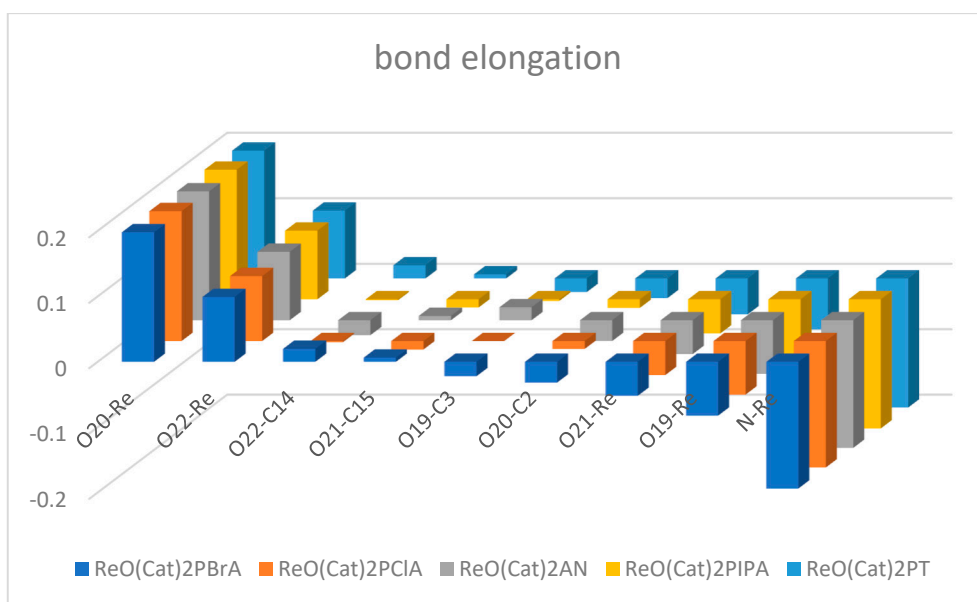

Figure S13. Graph of calculated bond elongation of prepared complexes.

Table S1. Cartesian coordinates calculated for the optimized neutral structure of complex 1.

| Input orientation: |               |             |                         |           |           |
|--------------------|---------------|-------------|-------------------------|-----------|-----------|
| Center Number      | Atomic Number | Atomic Type | Coordinates (Angstroms) |           |           |
|                    |               |             | X                       | Y         | Z         |
| 1                  | 6             | 0           | 5.542844                | 0.634768  | 0.330638  |
| 2                  | 6             | 0           | 5.333374                | -0.228210 | 1.433435  |
| 3                  | 6             | 0           | 4.068715                | -0.802056 | 1.671272  |
| 4                  | 6             | 0           | 3.042556                | -0.483579 | 0.776820  |
| 5                  | 6             | 0           | 3.243373                | 0.370372  | -0.333618 |
| 6                  | 6             | 0           | 4.501732                | 0.950356  | -0.563964 |
| 7                  | 6             | 0           | -2.461768               | -1.075022 | -0.484426 |
| 8                  | 6             | 0           | -1.908257               | -1.884622 | 0.538139  |
| 9                  | 6             | 0           | -2.663186               | -2.839711 | 1.229027  |
| 10                 | 6             | 0           | -4.018191               | -2.965728 | 0.871484  |
| 11                 | 6             | 0           | -4.585946               | -2.146348 | -0.138025 |
| 12                 | 6             | 0           | -3.822829               | -1.180954 | -0.818852 |
| 13                 | 8             | 0           | 2.121291                | 0.538634  | -1.094926 |
| 14                 | 8             | 0           | 1.735225                | -0.933728 | 0.860682  |
| 15                 | 8             | 0           | -1.558712               | -0.209201 | -1.019813 |
| 16                 | 8             | 0           | -0.587901               | -1.559890 | 0.789217  |
| 17                 | 75            | 0           | 0.395234                | -0.416098 | -0.446351 |
| 18                 | 8             | 0           | 0.591228                | -1.358134 | -1.898465 |
| 19                 | 6             | 0           | -1.989149               | 1.820752  | 1.119712  |
| 20                 | 6             | 0           | -3.080841               | 2.623249  | 1.478496  |
| 21                 | 6             | 0           | -3.268120               | 3.886376  | 0.879111  |
| 22                 | 6             | 0           | -2.345833               | 4.346562  | -0.083010 |
| 23                 | 6             | 0           | -1.250757               | 3.549753  | -0.448826 |

|    |    |   |           |           |           |
|----|----|---|-----------|-----------|-----------|
| 24 | 6  | 0 | -1.063389 | 2.275499  | 0.147368  |
| 25 | 7  | 0 | 0.080100  | 1.520576  | -0.179237 |
| 26 | 1  | 0 | 6.529739  | 1.059717  | 0.165941  |
| 27 | 1  | 0 | 6.157328  | -0.451868 | 2.105412  |
| 28 | 1  | 0 | 3.882026  | -1.464161 | 2.510523  |
| 29 | 1  | 0 | 4.657131  | 1.602218  | -1.417691 |
| 30 | 1  | 0 | -2.208609 | -3.447442 | 2.004576  |
| 31 | 1  | 0 | -4.638699 | -3.700286 | 1.377320  |
| 32 | 1  | 0 | -5.634495 | -2.271092 | -0.395977 |
| 33 | 1  | 0 | -4.247332 | -0.550414 | -1.592927 |
| 34 | 1  | 0 | -1.829047 | 0.864330  | 1.608095  |
| 35 | 1  | 0 | -3.781765 | 2.269159  | 2.229936  |
| 36 | 1  | 0 | -2.482727 | 5.319903  | -0.547289 |
| 37 | 1  | 0 | -0.545739 | 3.898279  | -1.201026 |
| 38 | 17 | 0 | -4.641158 | 4.887768  | 1.336911  |
| 39 | 1  | 0 | 0.619836  | 1.765067  | 0.954570  |

Table S2. Cartesian coordinates calculated for the optimized neutral structure of complex 2.

| Center<br>Number | Atomic<br>Number | Atomic<br>Type | Coordinates (Angstroms) |           |           |
|------------------|------------------|----------------|-------------------------|-----------|-----------|
|                  |                  |                | X                       | Y         | Z         |
| 1                | 6                | 0              | -4.063120               | -0.822081 | 1.673164  |
| 2                | 6                | 0              | -3.037877               | -0.499696 | 0.779060  |
| 3                | 6                | 0              | -3.240724               | 0.356227  | -0.329489 |
| 4                | 6                | 0              | -4.500288               | 0.934244  | -0.558189 |
| 5                | 6                | 0              | -5.540488               | 0.614719  | 0.336074  |
| 6                | 6                | 0              | -5.328973               | -0.250198 | 1.436961  |
| 7                | 1                | 0              | -3.874864               | -1.485608 | 2.510940  |
| 8                | 1                | 0              | -6.528264               | 1.038091  | 0.172604  |
| 9                | 1                | 0              | -6.152269               | -0.476894 | 2.108726  |
| 10               | 6                | 0              | 2.672592                | -2.845660 | 1.224387  |
| 11               | 6                | 0              | 4.027724                | -2.968270 | 0.866138  |
| 12               | 6                | 0              | 4.593551                | -2.145630 | -0.141799 |
| 13               | 6                | 0              | 3.828331                | -1.180272 | -0.820315 |
| 14               | 6                | 0              | 2.467176                | -1.077710 | -0.485224 |
| 15               | 6                | 0              | 1.915578                | -1.890572 | 0.535785  |
| 16               | 1                | 0              | 4.649828                | -3.702695 | 1.370204  |
| 17               | 1                | 0              | 5.642256                | -2.267776 | -0.400355 |
| 18               | 1                | 0              | 4.251352                | -0.547253 | -1.593178 |
| 19               | 8                | 0              | -2.119222               | 0.528300  | -1.090799 |
| 20               | 8                | 0              | -1.729643               | -0.947471 | 0.861538  |
| 21               | 8                | 0              | 0.594673                | -1.568952 | 0.787982  |
| 22               | 8                | 0              | 1.562258                | -0.212510 | -1.018468 |
| 23               | 8                | 0              | -0.585724               | -1.363758 | -1.898880 |
| 24               | 75               | 0              | -0.391093               | -0.424443 | -0.444822 |



|    |    |   |           |           |           |
|----|----|---|-----------|-----------|-----------|
| 25 | 1  | 0 | -4.657237 | 1.587620  | -1.410474 |
| 26 | 1  | 0 | 2.219455  | -3.455932 | 1.998783  |
| 27 | 6  | 0 | 1.062471  | 2.268726  | 0.154158  |
| 28 | 6  | 0 | 1.247158  | 3.544608  | -0.439383 |
| 29 | 6  | 0 | 2.340798  | 4.342772  | -0.072227 |
| 30 | 6  | 0 | 3.264297  | 3.882339  | 0.888614  |
| 31 | 6  | 0 | 3.079678  | 2.617577  | 1.485368  |
| 32 | 6  | 0 | 1.989435  | 1.813717  | 1.125231  |
| 33 | 1  | 0 | 0.541215  | 3.893358  | -1.190610 |
| 34 | 1  | 0 | 2.475643  | 5.317364  | -0.534477 |
| 35 | 1  | 0 | 3.781538  | 2.263256  | 2.235826  |
| 36 | 1  | 0 | 1.831359  | 0.855947  | 1.611629  |
| 37 | 7  | 0 | -0.079651 | 1.512270  | -0.173683 |
| 38 | 1  | 0 | -0.844224 | 2.072103  | -0.555460 |
| 39 | 35 | 0 | 4.752397  | 4.970922  | 1.387259  |

Table S3. Cartesian coordinates calculated for the optimized neutral structure of complex 3.

| Center<br>Number | Atomic<br>Number | Atomic<br>Type | Coordinates (Angstroms) |           |           |
|------------------|------------------|----------------|-------------------------|-----------|-----------|
|                  |                  |                | X                       | Y         | Z         |
| 1                | 6                | 0              | -5.503665               | 0.619118  | -0.417995 |
| 2                | 6                | 0              | -5.272530               | -0.298844 | -1.444051 |
| 3                | 6                | 0              | -3.997197               | -0.850686 | -1.657932 |
| 4                | 6                | 0              | -2.976104               | -0.446975 | -0.808412 |
| 5                | 6                | 0              | -3.208607               | 0.490725  | 0.246751  |
| 6                | 6                | 0              | -4.475102               | 1.032016  | 0.445606  |
| 7                | 6                | 0              | 2.338411                | -1.066907 | 0.554059  |
| 8                | 6                | 0              | 1.760862                | -1.818623 | -0.515814 |
| 9                | 6                | 0              | 2.493059                | -2.770799 | -1.213134 |
| 10               | 6                | 0              | 3.830048                | -2.962088 | -0.826945 |
| 11               | 6                | 0              | 4.401333                | -2.222613 | 0.212784  |
| 12               | 6                | 0              | 3.667625                | -1.257821 | 0.920882  |
| 13               | 8                | 0              | -2.124800               | 0.781686  | 0.975455  |
| 14               | 8                | 0              | -1.695355               | -0.868402 | -0.899448 |
| 15               | 8                | 0              | 1.490780                | -0.193647 | 1.111506  |
| 16               | 8                | 0              | 0.478405                | -1.479462 | -0.776911 |
| 17               | 75               | 0              | -0.438529               | -0.297584 | 0.513150  |
| 18               | 8                | 0              | -0.769616               | -1.167986 | 1.923151  |
| 19               | 6                | 0              | 1.899900                | 1.555041  | -1.300597 |
| 20               | 6                | 0              | 3.115252                | 2.107022  | -1.711273 |
| 21               | 6                | 0              | 3.641995                | 3.231804  | -1.068705 |
| 22               | 6                | 0              | 2.947427                | 3.811388  | -0.001369 |
| 23               | 6                | 0              | 1.735144                | 3.272554  | 0.429766  |
| 24               | 6                | 0              | 1.210461                | 2.133798  | -0.216401 |

|    |   |   |           |           |           |
|----|---|---|-----------|-----------|-----------|
| 25 | 7 | 0 | -0.049292 | 1.595891  | 0.190364  |
| 26 | 1 | 0 | -6.503627 | 1.027578  | -0.275784 |
| 27 | 1 | 0 | -6.091643 | -0.599636 | -2.095002 |
| 28 | 1 | 0 | -3.808137 | -1.566384 | -2.453663 |
| 29 | 1 | 0 | -4.653843 | 1.740756  | 1.248666  |
| 30 | 1 | 0 | 2.040587  | -3.339781 | -2.021147 |
| 31 | 1 | 0 | 4.428820  | -3.704614 | -1.352055 |
| 32 | 1 | 0 | 5.441691  | -2.396537 | 0.486735  |
| 33 | 1 | 0 | 4.107113  | -0.679774 | 1.729108  |
| 34 | 1 | 0 | 1.496985  | 0.690452  | -1.829894 |
| 35 | 1 | 0 | 3.654636  | 1.655570  | -2.544246 |
| 36 | 1 | 0 | 4.588421  | 3.654564  | -1.397319 |
| 37 | 1 | 0 | 3.356465  | 4.687976  | 0.500511  |
| 38 | 1 | 0 | 1.207488  | 3.719859  | 1.268892  |
| 39 | 1 | 0 | -0.715466 | 2.331344  | 0.483086  |

Table S4. Cartesian coordinates calculated for the optimized neutral structure of complex 4.

| Center<br>Number | Atomic<br>Number | Atomic<br>Type | Coordinates (Angstroms) |           |           |
|------------------|------------------|----------------|-------------------------|-----------|-----------|
|                  |                  |                | X                       | Y         | Z         |
| 1                | 6                | 0              | 4.594446                | -1.223763 | 1.885324  |
| 2                | 6                | 0              | 3.630113                | -0.921844 | 0.919151  |
| 3                | 6                | 0              | 3.489533                | -1.672997 | -0.271846 |
| 4                | 6                | 0              | 4.319007                | -2.779940 | -0.515151 |
| 5                | 6                | 0              | 5.295221                | -3.091341 | 0.451031  |
| 6                | 6                | 0              | 5.433892                | -2.327128 | 1.635131  |
| 7                | 1                | 0              | 4.678620                | -0.624627 | 2.786118  |
| 8                | 1                | 0              | 5.959985                | -3.934111 | 0.279652  |
| 9                | 1                | 0              | 6.197178                | -2.593954 | 2.360776  |
| 10               | 6                | 0              | -0.190822               | 3.920480  | 1.390666  |
| 11               | 6                | 0              | -1.257372               | 4.742570  | 0.983292  |
| 12               | 6                | 0              | -2.044858               | 4.409672  | -0.149147 |
| 13               | 6                | 0              | -1.793482               | 3.251991  | -0.906876 |
| 14               | 6                | 0              | -0.708778               | 2.446186  | -0.519939 |
| 15               | 6                | 0              | 0.059833                | 2.776485  | 0.623803  |
| 16               | 1                | 0              | -1.482321               | 5.644543  | 1.545588  |
| 17               | 1                | 0              | -2.858862               | 5.067754  | -0.441889 |
| 18               | 1                | 0              | -2.389025               | 2.990015  | -1.774996 |
| 19               | 8                | 0              | 2.500038                | -1.204566 | -1.089878 |
| 20               | 8                | 0              | 2.703890                | 0.104927  | 1.000890  |
| 21               | 8                | 0              | 1.007771                | 1.808180  | 0.899741  |
| 22               | 8                | 0              | -0.303024               | 1.290037  | -1.112612 |
| 23               | 8                | 0              | 2.210597                | 1.267547  | -1.730836 |
| 24               | 75               | 0              | 1.422590                | 0.434686  | -0.419687 |

|    |   |   |           |           |           |
|----|---|---|-----------|-----------|-----------|
| 25 | 1 | 0 | 4.213630  | -3.354396 | -1.429866 |
| 26 | 1 | 0 | 0.418832  | 4.148234  | 2.258897  |
| 27 | 6 | 0 | -1.237000 | -1.184782 | -0.247753 |
| 28 | 6 | 0 | -1.970365 | -2.131927 | -1.007792 |
| 29 | 6 | 0 | -3.350573 | -2.290487 | -0.815126 |
| 30 | 6 | 0 | -4.004846 | -1.496724 | 0.143386  |
| 31 | 6 | 0 | -3.296985 | -0.556464 | 0.914067  |
| 32 | 6 | 0 | -1.918212 | -0.402748 | 0.718128  |
| 33 | 1 | 0 | -1.460772 | -2.732557 | -1.757943 |
| 34 | 1 | 0 | -3.903990 | -3.014793 | -1.404362 |
| 35 | 1 | 0 | -3.808929 | 0.041698  | 1.661021  |
| 36 | 1 | 0 | -1.364080 | 0.297628  | 1.334869  |
| 37 | 7 | 0 | 0.157412  | -1.092274 | -0.409949 |
| 38 | 1 | 0 | 0.579656  | -1.930680 | -0.812784 |
| 39 | 6 | 0 | -5.520446 | -1.664908 | 0.358496  |
| 40 | 1 | 0 | -6.049234 | -1.183892 | -0.437686 |
| 41 | 1 | 0 | -5.765459 | -2.706399 | 0.371333  |
| 42 | 1 | 0 | -5.799689 | -1.221288 | 1.291300  |

Table S5. Cartesian coordinates calculated for the optimized neutral structure of complex 5.

| Center<br>Number | Atomic<br>Number | Atomic<br>Type | Coordinates (Angstroms) |           |           |
|------------------|------------------|----------------|-------------------------|-----------|-----------|
|                  |                  |                | X                       | Y         | Z         |
| 1                | 6                | 0              | -5.274891               | -2.854316 | 0.507536  |
| 2                | 6                | 0              | -5.383488               | -2.043586 | 1.663255  |
| 3                | 6                | 0              | -4.490584               | -0.975945 | 1.882863  |
| 4                | 6                | 0              | -3.504375               | -0.756903 | 0.916527  |
| 5                | 6                | 0              | -3.392647               | -1.555305 | -0.246554 |
| 6                | 6                | 0              | -4.276615               | -2.625928 | -0.459497 |
| 7                | 6                | 0              | 1.045716                | 2.299609  | -0.564375 |
| 8                | 6                | 0              | 0.273443                | 2.724611  | 0.544894  |
| 9                | 6                | 0              | 0.578110                | 3.881971  | 1.270800  |
| 10               | 6                | 0              | 1.703083                | 4.619266  | 0.857807  |
| 11               | 6                | 0              | 2.493522                | 4.191300  | -0.239914 |
| 12               | 6                | 0              | 2.186851                | 3.020511  | -0.956194 |
| 13               | 8                | 0              | -2.376898               | -1.165626 | -1.073211 |
| 14               | 8                | 0              | -2.530688               | 0.226937  | 0.970894  |
| 15               | 8                | 0              | 0.581594                | 1.147917  | -1.121169 |
| 16               | 8                | 0              | -0.740871               | 1.830637  | 0.834462  |
| 17               | 75               | 0              | -1.208700               | 0.428836  | -0.437375 |
| 18               | 8                | 0              | -1.917159               | 1.252253  | -1.799292 |
| 19               | 6                | 0              | 2.036768                | -0.574681 | 0.827798  |
| 20               | 6                | 0              | 3.395963                | -0.818981 | 1.067922  |
| 21               | 6                | 0              | 4.076234                | -1.833377 | 0.362270  |
| 22               | 6                | 0              | 3.381000                | -2.611025 | -0.586394 |
| 23               | 6                | 0              | 2.020841                | -2.372938 | -0.833787 |
| 24               | 6                | 0              | 1.335235                | -1.348439 | -0.130408 |
| 25               | 7                | 0              | -0.046401               | -1.171431 | -0.339694 |
| 26               | 1                | 0              | -5.980157               | -3.668079 | 0.358743  |

|    |   |   |           |           |           |
|----|---|---|-----------|-----------|-----------|
| 27 | 1 | 0 | -6.164835 | -2.245867 | 2.390563  |
| 28 | 1 | 0 | -4.551302 | -0.341977 | 2.761379  |
| 29 | 1 | 0 | -4.193656 | -3.236068 | -1.353260 |
| 30 | 1 | 0 | -0.035813 | 4.183113  | 2.113340  |
| 31 | 1 | 0 | 1.970972  | 5.528550  | 1.388756  |
| 32 | 1 | 0 | 3.353487  | 4.785232  | -0.538716 |
| 33 | 1 | 0 | 2.784167  | 2.685510  | -1.797609 |
| 34 | 1 | 0 | 1.508107  | 0.183630  | 1.397370  |
| 35 | 1 | 0 | 3.923980  | -0.225164 | 1.809361  |
| 36 | 1 | 0 | 3.898388  | -3.395971 | -1.132202 |
| 37 | 1 | 0 | 1.486565  | -2.963701 | -1.575371 |
| 38 | 6 | 0 | 5.773882  | -2.091804 | 0.476317  |
| 39 | 6 | 0 | 6.330231  | -3.239527 | -0.525877 |
| 40 | 1 | 0 | 5.879747  | -4.178003 | -0.278587 |
| 41 | 1 | 0 | 7.392697  | -3.316355 | -0.425367 |
| 42 | 1 | 0 | 6.085211  | -2.981196 | -1.534947 |
| 43 | 6 | 0 | 6.752344  | -1.196838 | 1.562949  |
| 44 | 1 | 0 | 6.260473  | -1.107345 | -0.650792 |
| 45 | 1 | 0 | 6.141948  | -0.506280 | 2.106527  |
| 46 | 1 | 0 | 7.496276  | -0.659147 | 1.013069  |
| 47 | 1 | 0 | 7.229475  | -1.866561 | 2.247606  |
| 48 | 1 | 0 | -0.542404 | -2.030712 | -0.464664 |

-----

Table S6. Chemical names, labels, and formulas of prepared rhenium complexes.

| Entry | Name                                                      | Label                                                        | Formula                                              |
|-------|-----------------------------------------------------------|--------------------------------------------------------------|------------------------------------------------------|
| 1     | N-(bis(1,2-dihydroxybenzene)oxorhenium)-parachloroaniline | [Re <sup>VII</sup> (O)(Cat) <sub>2</sub> PClA] <sup>-a</sup> | C <sub>18</sub> H <sub>12</sub> ClNO <sub>5</sub> Re |
| 2     | N-(bis(1,2-dihydroxybenzene)oxorhenium)-parabromoaniline  | [Re <sup>VII</sup> (O)(Cat) <sub>2</sub> PBrA] <sup>-a</sup> | C <sub>18</sub> H <sub>12</sub> BrNO <sub>5</sub> Re |
| 3     | N-(bis(1,2-dihydroxybenzene)oxorhenium)-aniline           | [Re <sup>VII</sup> (O)(Cat) <sub>2</sub> AN] <sup>-a</sup>   | C <sub>18</sub> H <sub>13</sub> NO <sub>5</sub> Re   |
| 4     | N-(bis(1,2-dihydroxybenzene)oxorhenium)-paratoluidine     | [Re <sup>VII</sup> (O)(Cat) <sub>2</sub> PT] <sup>-a</sup>   | C <sub>19</sub> H <sub>15</sub> NO <sub>5</sub> Re   |
| 5     | N-(bis(1,2-dihydroxybenzene)oxorhenium)-paracumidine      | [Re <sup>VII</sup> (O)(Cat) <sub>2</sub> PIPA] <sup>-a</sup> | C <sub>21</sub> H <sub>19</sub> NO <sub>5</sub> Re   |

Table S7. Calculated bond elongation of prepared complexes.

|                | ReO(Cat)2PBrA | ReO(Cat)2PClA | ReO(Cat)2AN | ReO(Cat)2PIPA | ReO(Cat)2PT |
|----------------|---------------|---------------|-------------|---------------|-------------|
| <b>O20-Re</b>  | 0.1979        | 0.1983        | 0.1967      | 0.1978        | 0.19499     |
| <b>O22-Re</b>  | 0.0992        | 0.0992        | 0.1043      | 0.1048        | 0.10348     |
| <b>O22-C14</b> | 0.0199        | -0.0019       | -0.0229     | -0.0014       | 0.02013     |
| <b>O21-C15</b> | 0.0064        | -0.013        | 0.0066      | -0.0125       | 0.00623     |
| <b>O19-C3</b>  | -0.022        | -0.0002       | 0.0197      | -0.0025       | -0.02089    |
| <b>O20-C2</b>  | -0.0317       | -0.0121       | -0.0318     | -0.0131       | -0.03019    |
| <b>O21-Re</b>  | -0.052        | -0.0521       | -0.0518     | -0.0522       | -0.05489    |
| <b>O19-Re</b>  | -0.0823       | -0.082        | -0.082      | -0.0836       | -0.07794    |
| <b>N-Re</b>    | -0.1938       | -0.1935       | -0.1953     | -0.1975       | -0.19741    |
